# Supplementary material for: Molecular Characterization and Prevalence of Antimicrobial-Resistant Escherichia coli Isolates Derived from Clinical Specimens and Environmental Habitats
Source: MDPI journal article supplement (doi:10.3390/microorganisms11061399), 2023-05-26
Supplement: s1 [file s1]

# Molecular Characterization and Prevalence of Antimicrobial Resistant *Escherichia coli* Isolates Derived from Clinical Specimens and Environmental Habitats

Chrysoula Dioli<sup>1</sup>, Olga Pappa<sup>1</sup>, Eirini Siatravani<sup>1,2</sup>, Spyridoula Bratakou<sup>1</sup>, Apostolos Tatsiopoulou<sup>3</sup>, Panagiota Giakkoupi<sup>4</sup>, Vivi Miriagou<sup>2</sup>, Apostolos Beloukas<sup>1,\*</sup>

<sup>1</sup> Molecular Microbiology and Immunology laboratory, Department of Biomedical Sciences, University of West Attica, 28 Ag. Spyridonos str 12243 Athens, Attica, Greece

<sup>2</sup> Hellenic Pasteur Institute, Laboratory of Bacteriology, 127 Vasilissis Sofias Avenue 11521, Athens, Greece

<sup>3</sup> Microbiology Laboratory, General Hospital of Livadeia, Agiou Vlasίου, 32100, Livadia, Viotia, Greece

<sup>4</sup> Department of Public Health Policy, School of Public Health University of West Attica, 196 Alexandras Avenue, 11521 Athens, Greece

\* **Correspondence:** [abeloukas@uniwa.gr](mailto:abeloukas@uniwa.gr)

## SUPPLEMENTARY MATERIAL

**Supplementary Table S1:** The *E. coli* isolates from environmental habitats and clinical specimens that exhibit multidrug resistance.

**Supplementary Table S2:** Observed patterns of R isolates (RP, resistant patterns).

**Supplementary Table S3:** Characteristics of environmental and clinical isolates harboring  $\beta$ -lactamase genes.

**Supplementary Table S4:** Sequencing results for the possible  $\beta$ -lactamase producers.

**Supplementary Table S5a:** Examination of the relationship between phylogenetic groups and origin of the sample; Sample and Group Crosstabulation.

**Supplementary Table S5b:** Examination of the relationship between phylogenetic groups and origin of the sample; Pearson's chi-square test results.

**Supplementary Table S6a:** Examination of the relationship between phylogenetic groups and resistance profile; Resistance profile and Group Crosstabulation.

**Supplementary Table S6b:** Examination of the relationship between phylogenetic groups and resistance profile; Pearson's chi-square test results.

**Supplementary Figure S1:** PFGE analysis; Diverse PFGE patterns of *E. coli* isolated from clinical and environmental samples.

**Supplementary Figure S2:** Maximum Likelihood phylogenetic trees for A) *bla*<sub>CTX-M</sub>-groups, B) *bla*<sub>TEM</sub> and C) *bla*<sub>SHV</sub> nucleotide sequences

**Supplementary Table S1.** The *E. coli* isolates from environmental habitats and clinical specimens that exhibit multidrug resistance

| Number of different antibiotic categories in which environmental MDR isolates presented resistance                                                        | Number of environmental isolates obtained from each sample source |                |        |       |       |
|-----------------------------------------------------------------------------------------------------------------------------------------------------------|-------------------------------------------------------------------|----------------|--------|-------|-------|
|                                                                                                                                                           | HWW                                                               | WWTP effluents | RWS1   | RWS2  | Total |
| 4 antibiotic categories                                                                                                                                   | 5                                                                 | 8              | 16     | 6     | 35    |
| 5 antibiotic categories                                                                                                                                   | 8                                                                 | 20             | 8      | 4     | 40    |
| 6 antibiotic categories                                                                                                                                   | 10                                                                |                | 3      |       | 13    |
| 7 antibiotic categories                                                                                                                                   | 13                                                                |                |        | 1     | 14    |
| <b>Total MDR</b>                                                                                                                                          | 36                                                                | 28             | 27     | 11    | 102   |
| Number of different antibiotic categories in which clinical MDR isolates presented resistance                                                             | Number of clinical isolates per specimen type                     |                |        |       |       |
|                                                                                                                                                           | Urine                                                             | Blood          | Tissue | Total |       |
| 4 antibiotic categories                                                                                                                                   | 2                                                                 | 1              |        | 3     |       |
| 5 antibiotic categories                                                                                                                                   | 5                                                                 | 1              |        | 6     |       |
| 6 antibiotic categories                                                                                                                                   | 5                                                                 | 1              | 1      | 7     |       |
| 7 antibiotic categories                                                                                                                                   | 2                                                                 | 1              |        | 3     |       |
| <b>Total MDR</b>                                                                                                                                          | 14                                                                | 4              | 1      | 19    |       |
| Abbreviations: MDR, Multi-drug resistant; HWW, hospital wastewater; WWTP, wastewater treatment plant; RWS1, river water site 1; RWS2, river water site 2. |                                                                   |                |        |       |       |

**Supplementary Table S2:** Observed patterns of R isolates (RP, resistant patterns)

|                                                                                                                                                                                                                                                                                                                                                                                                                    |                                                  | Environmental isolates<br>(source) | Clinical Isolates                  | Total |    |
|--------------------------------------------------------------------------------------------------------------------------------------------------------------------------------------------------------------------------------------------------------------------------------------------------------------------------------------------------------------------------------------------------------------------|--------------------------------------------------|------------------------------------|------------------------------------|-------|----|
| RP1: Related to ESBL<br>production                                                                                                                                                                                                                                                                                                                                                                                 |                                                  | PEN/ ESCs                          | 4 (2 RWS1, 2 RWS2)                 | -     | 4  |
|                                                                                                                                                                                                                                                                                                                                                                                                                    |                                                  | PEN/ ESCs/ ATM                     | -                                  | 2     | 2  |
| RP2: Related to Ampc β-<br>lactamases production                                                                                                                                                                                                                                                                                                                                                                   |                                                  | PEN/ PEN.-inhibitor/ FOX           | -                                  | 1     | 1  |
| RP3a                                                                                                                                                                                                                                                                                                                                                                                                               |                                                  | PEN/ PEN-inhibitor                 | 56 (30 WWTP, 18 RWS1, 8 RWS2)      | 19    | 75 |
| RP3b                                                                                                                                                                                                                                                                                                                                                                                                               |                                                  | PEN/ PEN-inhibitor + SXT           | 20 (3 HWW, 8 WWTP, 5 RWS1, 4 RWS2) | 1     | 21 |
| RP3c                                                                                                                                                                                                                                                                                                                                                                                                               |                                                  | PEN/ PEN-inhibitor + AMG           | 4 (3 WWTP, 1 RWS1)                 | 2     | 6  |
| RP3d                                                                                                                                                                                                                                                                                                                                                                                                               |                                                  | PEN/ PEN-inhibitor + QNs           | 18 (2 HWW, 9 WWTP, 3 RWS1, 4 RWS2) | -     | 18 |
| RP4a                                                                                                                                                                                                                                                                                                                                                                                                               |                                                  | PEN                                | 33 (13 WWTP, 18 RWS1, 2 RWS2)      | 8     | 41 |
| RP4b                                                                                                                                                                                                                                                                                                                                                                                                               |                                                  | PEN + SXT                          | 14 (2 WWTP, 10 RWS1, 2 RWS2)       | 4     | 18 |
| RP4c                                                                                                                                                                                                                                                                                                                                                                                                               |                                                  | PEN + SXT+ QNs                     | 11 (3 WWTP, 8 RWS1)                | -     | 11 |
| RP4d                                                                                                                                                                                                                                                                                                                                                                                                               |                                                  | PEN + QNs                          | 10 (3 WWTP, 5 RWS1, 2 RWS2)        | -     | 10 |
| RP4e                                                                                                                                                                                                                                                                                                                                                                                                               |                                                  | PEN + AMG + QNs                    | -                                  | 1     | 1  |
| RP4f                                                                                                                                                                                                                                                                                                                                                                                                               |                                                  | PEN + AMG                          | 5 (1 WWTP, 2 RWS1, 2 RWS2)         | 1     | 5  |
| RP4g                                                                                                                                                                                                                                                                                                                                                                                                               |                                                  | PEN + SXT + AMG                    | -                                  | 3     | 3  |
| RP5                                                                                                                                                                                                                                                                                                                                                                                                                | Resistant only to<br>non β-lactam<br>antibiotics | QNs                                | 5 (3 HWW, 2 WWTP)                  | 15    | 20 |
| RP6                                                                                                                                                                                                                                                                                                                                                                                                                |                                                  | SXT                                | -                                  | 4     | 4  |
| RP6a                                                                                                                                                                                                                                                                                                                                                                                                               |                                                  | SXT + QNs                          | 3 (2 RWS1, 1 RWS2)                 | 3     | 7  |
| Abbreviations: RP, resistant patterns; ESBL, extended-spectrum-β-lactamase; PEN, penicillins; ESCs, extended-spectrum cephalosporins; ATM, aztreonam; PEN.-inhibitor, penicillin-inhibitor combination; FOX, cefoxitin; SXT, sulfamethoxazole-trimethoprim; AMG, aminoglycosides; QNs, quinolones; HWW, hospital wastewater; WWTP, wastewater treatment plant; RWS1, river water site 1; RWS2, river water site 2. |                                                  |                                    |                                    |       |    |

**Supplementary Table S3.** Characteristics of environmental and clinical isolates harboring  $\beta$ -lactamase genes

| Isolate ID | Type of Sample/<br>Sampling site   | Phylogenetic group | Resistance Pattern                                              | Resistance Profile | DDST | $\beta$ -lactamases   |
|------------|------------------------------------|--------------------|-----------------------------------------------------------------|--------------------|------|-----------------------|
| 297        | Treated Wastewater/<br>WWTP outlet | A                  | AMP, AMC, PIP, CAZ, CRO, ATM, AN                                | MDR                | +    | SHV                   |
| 326        | Treated Wastewater/<br>WWTP outlet | B2                 | AMP, PIP, MEM, IMP                                              | R                  |      | TEM                   |
| 344        | HWW/ septic tank                   | A                  | AMP, PIP, CXM, CAZ, CTX, FEP, CRO, ATM, CIP, NAL                | MDR                | +    | SHV                   |
| 345        | HWW/ septic tank                   | A                  | AMP, PIP, CAZ, CTX, CRO, ATM, NAL                               | MDR                | +    | SHV                   |
| 367        | River water/<br>RWS1               | A                  | AMP, AMC, TZP, PIP, CXM, CAZ, CTX, FEP, FOX, CRO, ATM, MEM, IMP | MDR                | -    | -                     |
| 405        | River water/<br>RWS1               | D                  | AMP, AMC, PIP, CXM, CTX, CRO, ATM, CIP, NAL                     | MDR                | +    | CTX-M group 1         |
| 408        | River water/<br>RWS1               | D                  | AMP, AMC, TZP, PIP, TCC, CXM, CAZ, CTX, FEP, CRO, ATM, MEM, SXT | MDR                | +    | CTX-M group 1, OXA-48 |
| 426        | HWW/ septic tank                   | D                  | AMP, AMC, PIP, CXM, CAZ, CTX, CRO, ATM, CIP, NAL                | MDR                | +    | SHV                   |
| 427        | HWW/ septic tank                   | B2                 | AMP, AMC, PIP, CXM, CAZ, CTX, CRO, ATM, AN, CIP, NAL            | MDR                | +    | SHV                   |
| 431        | HWW/ septic tank                   | B2                 | AMP, PIP, CXM, CAZ, CTX, CRO, ATM, AN, CIP, NAL                 | MDR                | +    | SHV                   |
| 434        | HWW/ septic tank                   | B2                 | AMP, AMC, PIP, CAZ, CTX, CRO, ATM, CIP, NAL                     | MDR                | +    | SHV                   |
| 436        | HWW/ septic tank                   | B2                 | AMP, AMC, PIP, CXM, CAZ, CTX, CRO, ATM, AN, CIP, NAL            | MDR                | +    | SHV                   |
| 472        | River water/<br>RWS1               | A                  | AMP, AMC, PIP, CXM, CTX, CRO, ATM, NAL                          | MDR                | +    | CTX-M group 9, TEM    |
| 477        | River water/<br>RWS1               | B1                 | AMP, PIP, CXM, CAZ, CRO, ATM, CIP, NAL                          | MDR                | +    | SHV                   |
| 491        | Treated Wastewater/<br>WWTP outlet | A                  | AMP, AMC, PIP, CXM, CTX, CRO, FEP, ATM, NAL                     | MDR                | +    | CTX-M group 1         |
| 494        | Treated Wastewater/<br>WWTP outlet | B1                 | AMP, AMC, PIP, CXM, CTX, CRO, SXT                               | MDR                | +    | TEM                   |

|     |                                    |    |                                                                |     |   |                         |
|-----|------------------------------------|----|----------------------------------------------------------------|-----|---|-------------------------|
|     | WWTP outlet                        |    |                                                                |     |   |                         |
| 497 | Treated Wastewater/<br>WWTP outlet | A  | AMP, AMC, PIP, CXM, CAZ, CTX, FEP, CRO, ATM, NAL               | MDR | + | CTX-M group 1           |
| 506 | Treated Wastewater/<br>WWTP outlet | D  | AMP, PIP, CXM, CAZ, CTX, FEP, ATM, SXT, NAL                    | MDR | + | CTX-M group 1           |
| 510 | Treated Wastewater/<br>WWTP outlet | B2 | AMP, PIP, CXM, CTX, CRO, SXT, CIP, NAL                         | MDR | + | -                       |
| 546 | HWW/ septic<br>tank                | B2 | AMP, AMC, PIP, CXM, CAZ, CTX, CRO, ATM, NAL                    | MDR | + | SHV                     |
| 550 | HWW/ septic<br>tank                | A  | AMP, AMC, TZP, PIP, CXM, FOX, FEP, GM, SXT, CIP, NAL           | MDR | - | -                       |
| 553 | HWW/ septic<br>tank                | A  | AMP, AMC, PIP, CXM, CTX, CRO, ATM, SXT, CIP, NAL               | MDR | + | CTX-M group 1           |
| 555 | HWW/ septic<br>tank                | A  | AMP, AMC, PIP, CXM, CAZ, CTX, FEP, CRO, ATM, GM, SXT, CIP, NAL | MDR | + | CTX-M group 1           |
| 556 | HWW/ septic<br>tank                | A  | AMP, PIP, CXM, CAZ, CTX, FEP, CRO, ATM, CIP, NAL               | MDR | + | SHV                     |
| 557 | HWW/ septic<br>tank                | A  | AMP, AMC, PIP, CXM, CTX, FEP, CRO, ATM, GN, SXT, CIP, NAL      | MDR | + | CTX-M group 1, TEM, SHV |
| 581 | HWW/ septic<br>tank                | A  | AMP, AMC, TZP, PIP, CXM, FOX, FEP, GM, SXT, NAL, CIP           | MDR | - | FOX                     |
| 594 | River water/<br>RWS1               | B1 | AMP, PIP, CXM, CAZ, CTX, CRO, ATM, CIP, NAL                    | MDR | + | SHV                     |
| 595 | River water/<br>RWS1               | B2 | AMP, PIP, CXM, CAZ, CTX, FEP, CRO, ATM                         | MDR | + | CTX-M group 1           |
| 598 | River water/<br>RWS1               | D  | AMP, PIP, CXM, CAZ, CTX, FEP, CRO, ATM, GN, SXT, NAL           | MDR | + | CTX-M group 1           |
| 601 | River water/<br>RWS1               | A  | AMP, PIP, CXM, CAZ, CTX, FEP, CRO                              | R   | + | CTX-M group 9           |
| 602 | River water/<br>RWS1               | A  | AMP, PIP, CXM, CAZ, CRO, ATM                                   | MDR | + | -                       |
| 610 | River water/<br>RWS1               | D  | AMP, PIP, CXM, CAZ, CTX, FEP, CRO, ATM, GN, SXT, NAL           | MDR | + | CTX-M group 1           |
| 611 | River water/<br>RWS1               | A  | AMP, PIP, CXM, CTX, FEP, CRO                                   | R   | + | CTX-M group 9           |
| 614 | River water/<br>RWS2               | A  | AMP, PIP, CXM, CTX, FEP, CRO                                   | R   | + | CTX-M group 9           |

|     |                                 |        |    |                                                                |     |   |               |
|-----|---------------------------------|--------|----|----------------------------------------------------------------|-----|---|---------------|
| 616 | River RWS2                      | water/ | A  | AMP, PIP, CXM, CTX, FEP, CRO                                   | R   | + | CTX-M group 9 |
| 618 | River RWS2                      | water/ | A  | AMP, AMC, PIP, CXM, CAZ, CTX, FEP, CRO, ATM                    | MDR | + | CTX-M group 9 |
| 620 | River RWS2                      | water/ | A  | AMP, PIP, CXM, CTX, FEP, CRO, ATM, AN                          | MDR | + | -             |
| 630 | River RWS2                      | water/ | A  | AMP, AMC, PIP, CXM, CTX, FEP, CRO, ATM, AN                     | MDR | + | -             |
| 638 | Treated Wastewater/ WWTP outlet |        | D  | AMP, PIP, CXM, CAZ, CTX, FEP, CRO, ATM, SXT, NAL               | MDR | + | CTX-M group 1 |
| 645 | Treated Wastewater/ WWTP outlet |        | D  | AMP, AMC, PIP, CXM, CAZ, CTX, FEP, CRO, ATM, NAL               | MDR | + | CTX-M group 1 |
| 673 | HWW/ tank                       | septic | A  | AMP, PIP, CAZ, CRO, ATM, NAL                                   | MDR | + | SHV           |
| 678 | HWW/ tank                       | septic | A  | AMP, AMC, PIP, CXM, CAZ, CTX, FEP, CRO, ATM, GN, SXT, CIP, NAL | MDR | + | CTX-M group 1 |
| 681 | HWW/ tank                       | septic | A  | AMP, PIP, CXM, CTX, FEP, CRO, ATM, GN, SXT, CIP, NAL           | MDR | + | CTX-M group 1 |
| 682 | HWW/ tank                       | septic | A  | AMP, AMC, PIP, CXM, CAZ, CTX, FEP, CRO, ATM, GN, SXT, CIP, NAL | MDR | + | CTX-M group 1 |
| 683 | HWW/ tank                       | septic | A  | AMP, AMC, PIP, CXM, CAZ, CTX, FEP, CRO, ATM, GN, SXT, CIP, NAL | MDR | + | CTX-M group 1 |
| 738 | River RWS1                      | water/ | B2 | AMP, AMC, TZP, PIP, CXM, FOX, CAZ, GM, AN                      | MDR | - | TEM           |
| 739 | River RWS1                      | water/ | A  | AMP, PIP, CXM, CAZ, CTX, CRO, ATM, CIP, NAL                    | MDR | + | SHV           |
| 740 | River RWS1                      | water/ | A  | AMP, PIP, CXM, CAZ, CTX, FEP, CRO, ATM, SXT                    | MDR | + | CTX-M group 1 |
| 748 | River RWS1                      | water/ | D  | AMP, AMC, PIP, CXM, CAZ, CTX, FEP, CRO, ATM, NAL               | MDR | + | CTX-M group 1 |
| 785 | River RWS2                      | water/ | D  | AMP, AMC, PIP, CXM, CAZ, CTX, FEP, CRO, ATM, IMP, SXT, NAL     | MDR | + | CTX-M group 1 |
| 791 | River RWS2                      | water/ | D  | AMP, PIP, CXM, CAZ, CTX, FEP, CRO, ATM, CIP, NAL               | MDR | + | CTX-M group 1 |
| 792 | Treated Wastewater/ WWTP outlet |        | A  | AMP, PIP, CXM, CAZ, CTX, FEP, CRO, ATM, SXT                    | MDR | + | CTX-M group 1 |
| 801 | Treated Wastewater/             |        | A  | AMP, PIP, CXM, CAZ, CTX, FEP, CRO, ATM,                        | MDR | + | CTX-M group 1 |

|        |                                 |    |                                                                         |     |   |                    |
|--------|---------------------------------|----|-------------------------------------------------------------------------|-----|---|--------------------|
|        | WWTP outlet                     |    | SXT                                                                     |     |   |                    |
| 802    | Treated Wastewater/ WWTP outlet | A  | AMP, PIP, CXM, CAZ, CTX, FEP, CRO, ATM, SXT                             | MDR | + | CTX-M group 1      |
| 803    | Treated Wastewater/ WWTP outlet | A  | AMP, PIP, CXM, CAZ, CTX, FEP, CRO, ATM, SXT                             | MDR | + | CTX-M group 1      |
| 806    | Treated Wastewater/ WWTP outlet | A  | AMP, PIP, CXM, CAZ, CTX, FEP, CRO, ATM, STX                             | MDR | + | CTX-M group 1      |
| 810    | Treated Wastewater/ WWTP outlet | B2 | AMP, PIP, CXM, CAZ, CTX, FEP, CRO, ATM, STX                             | MDR | + | CTX-M group 9      |
| 838    | HWW/ septic tank                | A  | AMP, PIP, CXM, CAZ, CTX, FEP, CRO, ATM, GM, SXT, CIP, NAL               | MDR | + | CTX-M group 1      |
| 839    | HWW/ septic tank                | A  | AMP, PIP, CXM, CAZ, CTX, FEP, CRO, ATM, GM, SXT, CIP, NAL               | MDR | + | CTX-M group 1      |
| 852    | HWW/s eptic tank                | B2 | AMP, PIP, CXM, CAZ, CTX, FEP, CRO, ATM, AN, CIP, NAL                    | MDR | + | CTX-M group 1      |
| 858    | HWW/ septic tank                | A  | AMP, AMC, PIP, CXM, CAZ, CTX, FOX, CRO, ATM, IMP                        | MDR | - | CMY                |
| 117cli | Clinical/ urine                 | A  | AMP, AMC, PIP, CXM, CAZ, CTX, FEP, CRO, ATM, STX                        | MDR | + | CTX-M group 1, TEM |
| 203cli | Clinical/ blood                 | D  | AMP, AMC, PIP, CXM, CAZ, CTX, FOX, CRO, ATM, STX, NAL                   | MDR | + | CTX-M group 1, TEM |
| 22cli  | Clinical/ urine                 | B2 | AMP, AMC, PIP, CXM, CAZ, CTX, FEP, CRO, ATM, AN (I), CIP, NAL           | MDR | + | CTX-M group 1      |
| 294cli | Clinical/ urine                 | B2 | AMP, PIP, CXM, CTX, CRO, ATM                                            | R   | + | CTX-M group 1      |
| 325cli | Clinical/ blood                 | A  | AMP, PIP, CXM, CAZ, CTX, CRO, ATM                                       | R   | + | CTX-M group 1      |
| 333cli | Clinical/ wound                 | B2 | AMP, AMC, PIP, CXM, CTX, FEP, CRO, ATM, GM, CIP, NAL                    | MDR | + | CTX-M group 1, SHV |
| 350cli | Clinical/ urine                 | B2 | AMP, PIP, CXM, CAZ, CTX, CRO, FEP, ATM, SXT, CIP, NAL                   | MDR | + | CTX-M group 1      |
| 54cli  | Clinical/ urine                 | B2 | AMP, AMC, PIP, TZP, TCC, CXM, CAZ, CTX, FEP, CRO, ATM, GM, AN, CIP, NAL | MDR | + | CTX-M group 1, TEM |
| 59cli  | Clinical/ blood                 | D  | AMP, AMC, PIP, TZP, TCC, CXM, CAZ, CTX,                                 | MDR | + | CTX-M-group 1, TEM |





**Supplementary Table S4.** Sequencing results for the possible  $\beta$ -lactamase producers

| <i>E. coli</i> isolates                                                                                                                                                     | NCBI Reference Sequence     | <i>bla</i> gene                                                                        | Query cover | Identity value |
|-----------------------------------------------------------------------------------------------------------------------------------------------------------------------------|-----------------------------|----------------------------------------------------------------------------------------|-------------|----------------|
| <i>E. coli</i> -22_CTX-M-group 1 (clinical/ urine)                                                                                                                          | <a href="#">NG_048935.1</a> | <i>bla</i> <sub>CTX-M-15-like</sub> (ESBL)                                             | 99%         | 99.04%         |
| <i>E. coli</i> -59_CTX-M-group 1 (clinical/ blood)                                                                                                                          | <a href="#">NG_048935.1</a> | <i>bla</i> <sub>CTX-M-15-like</sub> (ESBL)                                             | 97%         | 99.27%         |
| <i>E. coli</i> -60_CTX-M-group 1 (clinical/ urine)                                                                                                                          | <a href="#">NG_048935.1</a> | <i>bla</i> <sub>CTX-M-15-like</sub> (ESBL)                                             | 99%         | 99.74%         |
| <i>E. coli</i> -491_CTX-M group 1 (environmental/ WWTP)                                                                                                                     | <a href="#">NG_048897.1</a> | <i>bla</i> <sub>CTX-M-1-like</sub> (ESBL)                                              | 96%         | 99.27%         |
| <i>E. coli</i> -678_CTX-M-group 1 (environmental/ HWW)                                                                                                                      | <a href="#">NG_048935.1</a> | <i>bla</i> <sub>CTX-M-15-like</sub> (ESBL)                                             | 95%         | 99.51%         |
| <i>E. coli</i> -472_CTX-M-group 9 (environmental/ RWS1)                                                                                                                     | <a href="#">NG_049043.1</a> | <i>bla</i> <sub>CTX-M-9-like</sub> (ESBL)                                              | 90%         | 99.39%         |
| <i>E. coli</i> -616_CTX-M-group 9 (environmental/ RSW2)                                                                                                                     | <a href="#">NG_049043.1</a> | <i>bla</i> <sub>CTX-M-9</sub> (ESBL)                                                   | 90%         | 100%           |
| <i>E. coli</i> -618_CTX-M-group 9 (environmental/ RSW2)                                                                                                                     | <a href="#">NG_049043.1</a> | <i>bla</i> <sub>CTX-M-9</sub> (ESBL)                                                   | 98%         | 100%           |
| <i>E. coli</i> -858_CMY-2 like AmpC (environmental/ HWW)                                                                                                                    | <a href="#">NG_048834.1</a> | <i>bla</i> <sub>CMY-4-like</sub> (AmpC type $\beta$ -lactamases)                       | 97%         | 99.81%         |
| <i>E. coli</i> -581_FOX like AmpC (environmental/ HWW)                                                                                                                      | <a href="#">NG_068170.1</a> | <i>bla</i> <sub>FOX-17</sub> (AmpC type $\beta$ -lactamases)                           | 98%         | 100%           |
| <i>E. coli</i> -408_OXA-48 like (environmental/ RWS1)                                                                                                                       | <a href="#">NG_049539.1</a> | <i>bla</i> <sub>OXA-244</sub> (carbapenemase_OXA-48 family class D $\beta$ -lactamase) | 99%         | 100%           |
| <i>E. coli</i> -297_SHV-like (environmental/ WWTP)                                                                                                                          | <a href="#">NG_050087.1</a> | <i>bla</i> <sub>SHV-5-like</sub> (ESBL)                                                | 97%         | 99.14%         |
| <i>E. coli</i> -333_SHV-like (clinical/ wound)                                                                                                                              | <a href="#">NG_050008.1</a> | <i>bla</i> <sub>SHV-13-like</sub> (ESBL)                                               | 97%         | 99.57%         |
| <i>E. coli</i> -427_SHV-like (environmental/HWW)                                                                                                                            | <a href="#">NG_050008.1</a> | <i>bla</i> <sub>SHV-13-like</sub> (ESBL)                                               | 97%         | 99.13%         |
| <i>E. coli</i> -739_SHV-like (environmental/RWS1)                                                                                                                           | <a href="#">NG_050008.1</a> | <i>bla</i> <sub>SHV-13</sub> (ESBL)                                                    | 97%         | 100%           |
| <i>E. coli</i> -203_TEM-like (clinical/ blood)                                                                                                                              | <a href="#">NG_050186.1</a> | <i>bla</i> <sub>TEM-143-like</sub> (ESBL)                                              | 99%         | 99.88%         |
| <i>E. coli</i> -494_TEM-like (environmental/ WWTP)                                                                                                                          | <a href="#">NG_050239.1</a> | <i>Bla</i> <sub>TEM-207</sub> (ESBL)                                                   | 99%         | 99.75%         |
| <i>E. coli</i> -738_TEM-like (environmental/ RWS1)                                                                                                                          | <a href="#">NG_050186.1</a> | <i>bla</i> <sub>TEM-143-like</sub> (ESBL)                                              | 99%         | 99.88%         |
| Abbreviations: ESBL, extended-spectrum- $\beta$ -lactamase; HWW, hospital wastewater; WWTP, wastewater treatment plant; RWS1, river water site 1; RWS2, river water site 2. |                             |                                                                                        |             |                |

**Supplementary Table S5a:** Examination of the relationship between phylogenetic groups and origin of the sample; Sample and Group Crosstabulation

|         |          |                       | Groups |       |       |       | Total |
|---------|----------|-----------------------|--------|-------|-------|-------|-------|
|         |          |                       | B1     | B2    | D     | A     |       |
| Samples | RWS1     | Count                 | 28     | 31    | 28    | 76    | 163   |
|         |          | Expected Count        | 23.1   | 47.3  | 24.7  | 67.9  | 163.0 |
|         |          | Residual              | 4.9    | -16.3 | 3.3   | 8.1   |       |
|         |          | Standardized Residual | 1.0    | -2.4  | .7    | 1.0   |       |
|         |          | Adjusted Residual     | 1.3    | -3.3  | .8    | 1.5   |       |
|         | RWS2     | Count                 | 12     | 7     | 10    | 34    | 63    |
|         |          | Expected Count        | 8.9    | 18.3  | 9.5   | 26.2  | 63.0  |
|         |          | Residual              | 3.1    | -11.3 | .5    | 7.8   |       |
|         |          | Standardized Residual | 1.0    | -2.6  | .2    | 1.5   |       |
|         |          | Adjusted Residual     | 1.2    | -3.3  | .2    | 2.1   |       |
|         | WWTP     | Count                 | 25     | 38    | 30    | 78    | 171   |
|         |          | Expected Count        | 24.3   | 49.6  | 25.9  | 71.2  | 171.0 |
|         |          | Residual              | .7     | -11.6 | 4.1   | 6.8   |       |
|         |          | Standardized Residual | .1     | -1.6  | .8    | .8    |       |
|         |          | Adjusted Residual     | .2     | -2.3  | 1.0   | 1.2   |       |
|         | HWW      | Count                 | 20     | 26    | 5     | 54    | 105   |
|         |          | Expected Count        | 14.9   | 30.5  | 15.9  | 43.7  | 105.0 |
|         |          | Residual              | 5.1    | -4.5  | -10.9 | 10.3  |       |
|         |          | Standardized Residual | 1.3    | -.8   | -2.7  | 1.6   |       |
|         |          | Adjusted Residual     | 1.6    | -1.1  | -3.2  | 2.2   |       |
|         | Clinical | Count                 | 6      | 84    | 24    | 25    | 139   |
|         |          | Expected Count        | 19.7   | 40.3  | 21.0  | 57.9  | 139.0 |
|         |          | Residual              | -13.7  | 43.7  | 3.0   | -32.9 |       |
|         |          | Standardized Residual | -3.1   | 6.9   | .6    | -4.3  |       |
|         |          | Adjusted Residual     | -3.8   | 9.2   | .8    | -6.4  |       |
| Total   |          | Count                 | 91     | 186   | 97    | 267   | 641   |
|         |          | Expected Count        | 91.0   | 186.0 | 97.0  | 267.0 | 641.0 |

**Supplementary Table S5b:** Examination of the relationship between phylogenetic groups and origin of the sample; Pearson's chi-square test results

|                              | <b>Value</b>         | <b>df</b> | <b>Asymptotic Significance (2-sided)</b> |
|------------------------------|----------------------|-----------|------------------------------------------|
| Pearson Chi-Square           | 110.630 <sup>a</sup> | 12        | <.001                                    |
| Likelihood Ratio             | 113.156              | 12        | <.001                                    |
| Linear-by-Linear Association | 10.731               | 1         | .001                                     |
| N of Valid Cases             | 641                  |           |                                          |

<sup>a</sup> 0 cells (0.0%) have expected count less than 5. The minimum expected count is 8.94.

**Supplementary Table S6a.** Examination of the relationship between phylogenetic groups and resistance profile; Resistance profile and Group Crosstabulation

|                                        |            |                       | Groups |       |       |      | Total |
|----------------------------------------|------------|-----------------------|--------|-------|-------|------|-------|
|                                        |            |                       | B1     | A     | B2    | D    |       |
| Environmental<br>Resistance<br>profile | MDR        | Count                 | 6      | 53    | 23    | 20   | 102   |
|                                        |            | Expected Count        | 16.4   | 42.5  | 27.7  | 15.4 | 102.0 |
|                                        |            | Residual              | -10.4  | 10.5  | -4.7  | 4.6  |       |
|                                        |            | Standardized Residual | -2.6   | 1.6   | -.9   | 1.2  |       |
|                                        |            | Adjusted Residual     | -3.1   | 2.3   | -1.1  | 1.4  |       |
|                                        | R          | Count                 | 19     | 92    | 43    | 28   | 182   |
|                                        |            | Expected Count        | 29.2   | 75.8  | 49.4  | 27.5 | 182.0 |
|                                        |            | Residual              | -10.2  | 16.2  | -6.4  | .5   |       |
|                                        |            | Standardized Residual | -1.9   | 1.9   | -.9   | .1   |       |
|                                        |            | Adjusted Residual     | -2.4   | 2.9   | -1.3  | .1   |       |
|                                        | N-WT       | Count                 | 1      | 8     | 3     | 1    | 13    |
|                                        |            | Expected Count        | 2.1    | 5.4   | 3.5   | 2.0  | 13.0  |
|                                        |            | Residual              | -1.1   | 2.6   | -.5   | -1.0 |       |
|                                        |            | Standardized Residual | -.8    | 1.1   | -.3   | -.7  |       |
|                                        |            | Adjusted Residual     | -.8    | 1.5   | -.3   | -.8  |       |
|                                        | WT         | Count                 | 71     | 89    | 21    | 24   | 205   |
|                                        |            | Expected Count        | 32.9   | 85.4  | 55.6  | 31.0 | 205.0 |
|                                        |            | Residual              | 38.1   | 3.6   | -34.6 | -7.0 |       |
|                                        |            | Standardized Residual | 6.6    | .4    | -4.6  | -1.3 |       |
|                                        |            | Adjusted Residual     | 8.8    | .6    | -6.6  | -1.7 |       |
| Clinical<br>Resistance<br>profile      | S clinical | Count                 | 1      | 11    | 38    | 6    | 56    |
|                                        |            | Expected Count        | 9.0    | 23.3  | 15.2  | 8.5  | 56.0  |
|                                        |            | Residual              | -8.0   | -12.3 | 22.8  | -2.5 |       |
|                                        |            | Standardized Residual | -2.7   | -2.6  | 5.8   | -.8  |       |
|                                        |            | Adjusted Residual     | -3.0   | -3.5  | 7.2   | -1.0 |       |
|                                        | MDR        | Count                 | 0      | 2     | 11    | 6    | 19    |
|                                        |            | Expected Count        | 3.1    | 7.9   | 5.2   | 2.9  | 19.0  |
|                                        |            | Residual              | -3.1   | -5.9  | 5.8   | 3.1  |       |

|       |                |                       |       |       |      |       |      |
|-------|----------------|-----------------------|-------|-------|------|-------|------|
|       |                | Standardized Residual | -1.7  | -2.1  | 2.6  | 1.8   |      |
|       |                | Adjusted Residual     | -1.9  | -2.8  | 3.1  | 2.0   |      |
|       | R              | Count                 | 5     | 12    | 35   | 12    | 64   |
|       |                | Expected Count        | 10.3  | 26.7  | 17.4 | 9.7   | 64.0 |
|       |                | Residual              | -5.3  | -14.7 | 17.6 | 2.3   |      |
|       |                | Standardized Residual | -1.6  | -2.8  | 4.2  | .7    |      |
|       |                | Adjusted Residual     | -1.9  | -3.9  | 5.2  | .9    |      |
| Total | Count          | 103                   | 267   | 174   | 97   | 641   |      |
|       | Expected Count | 103.0                 | 267.0 | 174.0 | 97.0 | 641.0 |      |

**Supplementary Table S6b.** Examination of the relationship between phylogenetic groups and resistance profile; Pearson's chi-square test results

|                              | Value                | df | Asymptotic Significance (2-sided) |
|------------------------------|----------------------|----|-----------------------------------|
| Pearson Chi-Square           | 184.099 <sup>a</sup> | 18 | <.001                             |
| Likelihood Ratio             | 179.391              | 18 | <.001                             |
| Linear-by-Linear Association | 4.029                | 1  | .045                              |
| N of Valid Cases             | 641                  |    |                                   |

<sup>a</sup> 5 cells (17.9%) have expected count less than 5. The minimum expected count is 1.97.

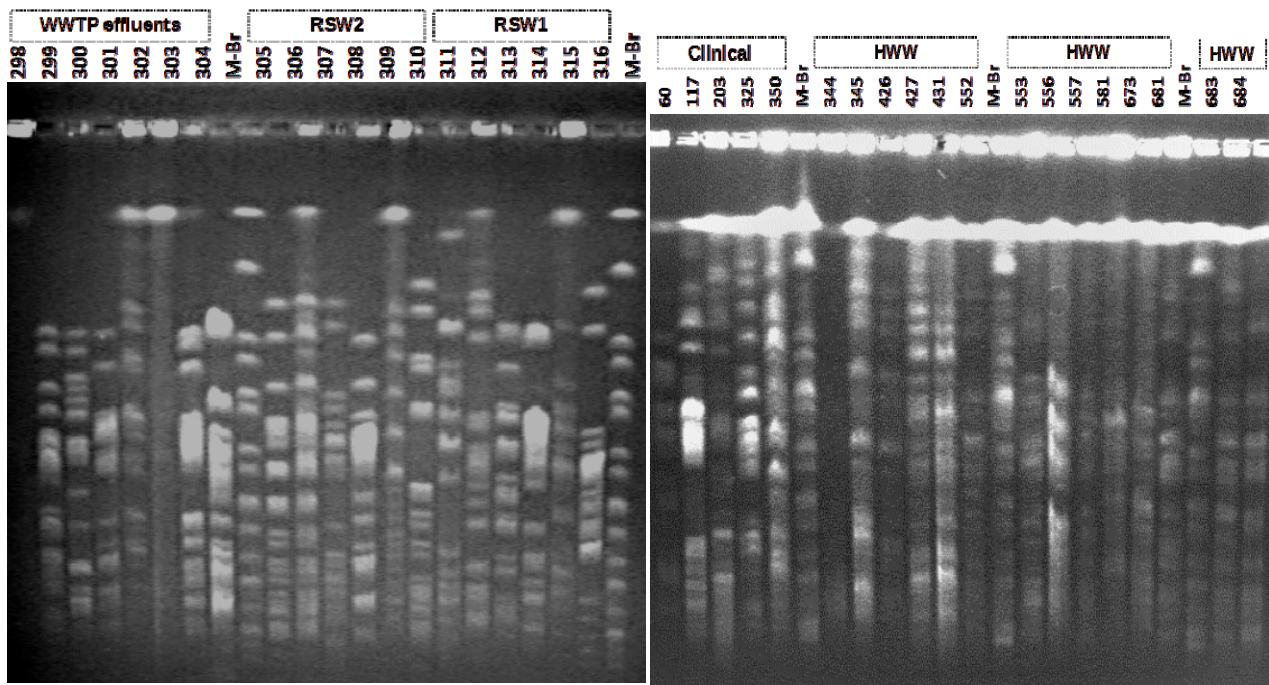

**Supplementary Figure S1.** PFGE analysis; Diverse PFGE patterns of *E. coli* isolated from clinical and environmental samples.

Abbreviations: HWW, hospital wastewater; WWTP, wastewater treatment plant; RWS1, river water site 1; RWS2, river water site 2.

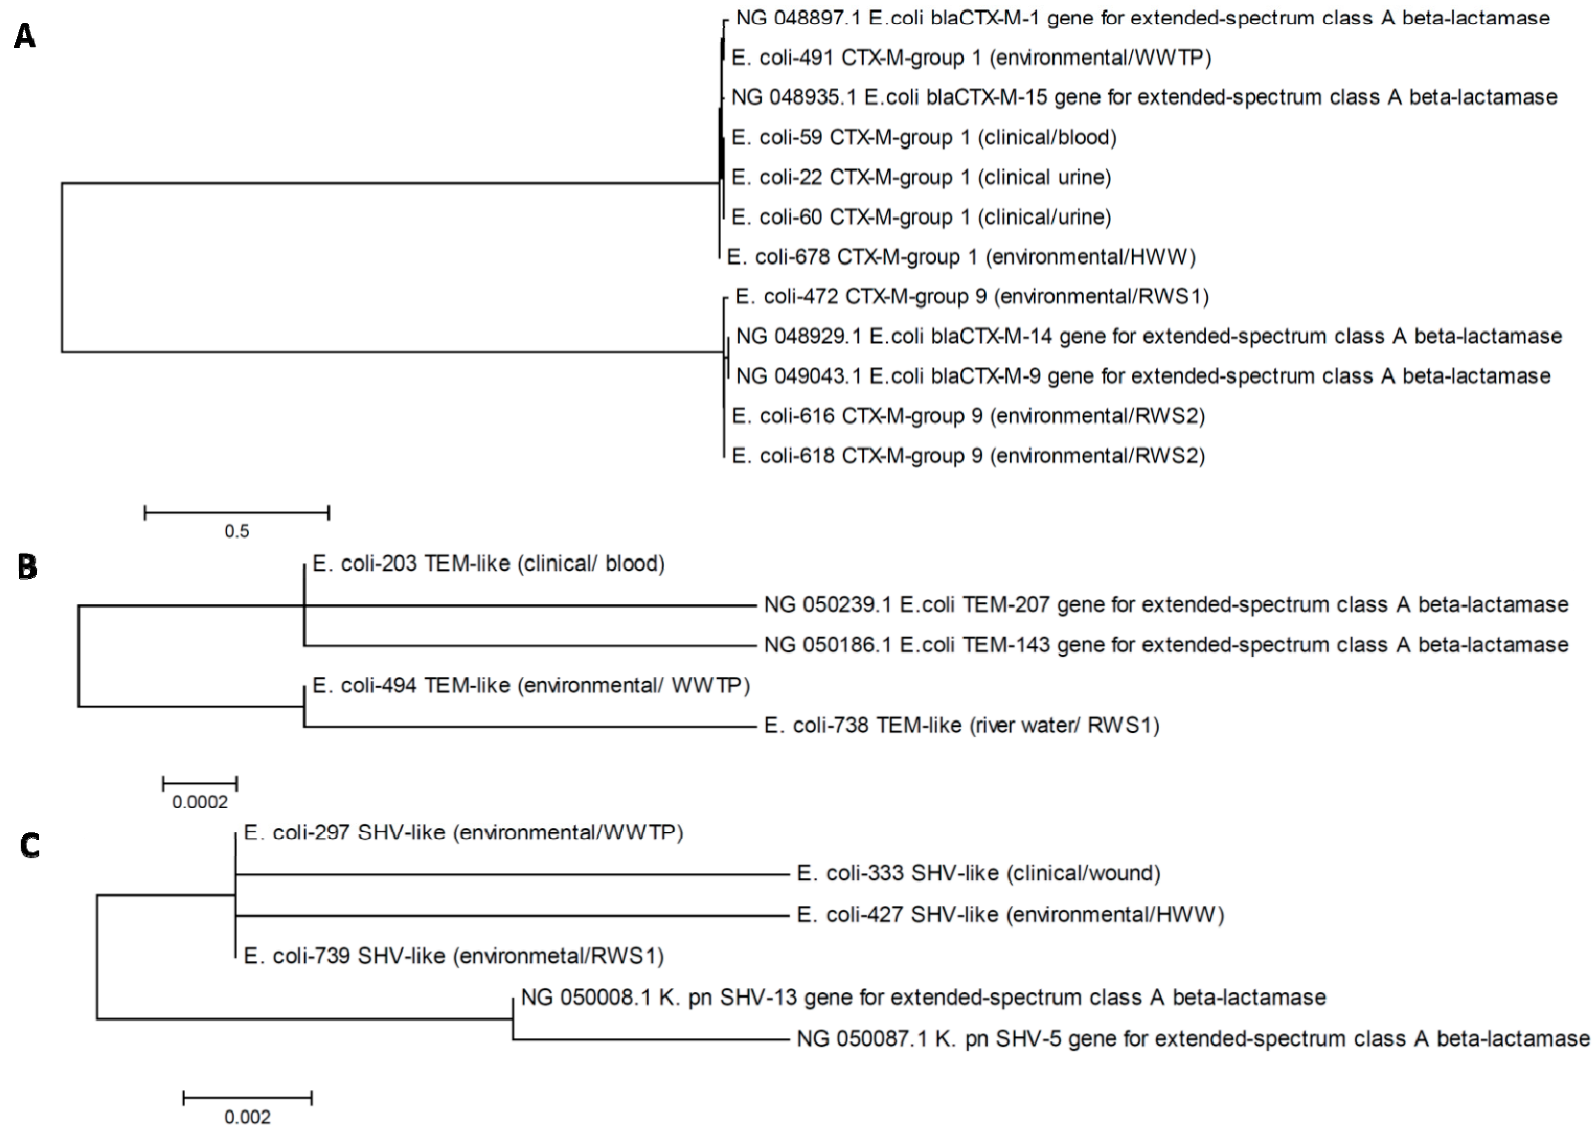

**Supplementary Figure S2:** Maximum Likelihood phylogenetic trees for A) *bla*<sub>CTX-M</sub>-groups, B) *bla*<sub>TEM</sub> and C) *bla*<sub>SHV</sub> nucleotide sequences.
